# Supplementary material for: Zinc(ii) nitrite coordination polymers based on rigid and flexible organic nitrogen donor ligands
Source: Royal Society of Chemistry journal article supplement (doi:10.1039/b701711a), 2007-01-01
Supplement: b701711a.pdf [file b701711a.pdf]

## **Electronic Supplementary Information for MS:**

### **Zinc(II) Nitrite Coordination Polymers Based on Rigid and Flexible Organic Nitrogen Donor**

**Maryam Ghoreishi Amiri<sup>1</sup>, Ghodrat Mahmoudi<sup>1</sup>, Ali Morsali<sup>\*1</sup>, Allen D. Hunter<sup>2</sup>  
and Matthias Zeller<sup>2</sup>**

<sup>1</sup> Department of Chemistry, Faculty of Sciences, Tarbiat Modares University, P.O. Box  
14115-175, Tehran, Islamic Republic of Iran

<sup>2</sup> Department of Chemistry, Youngstown State University, One University Plaza, P.O.  
Box 44555-3663, Youngstown, Ohio, USA

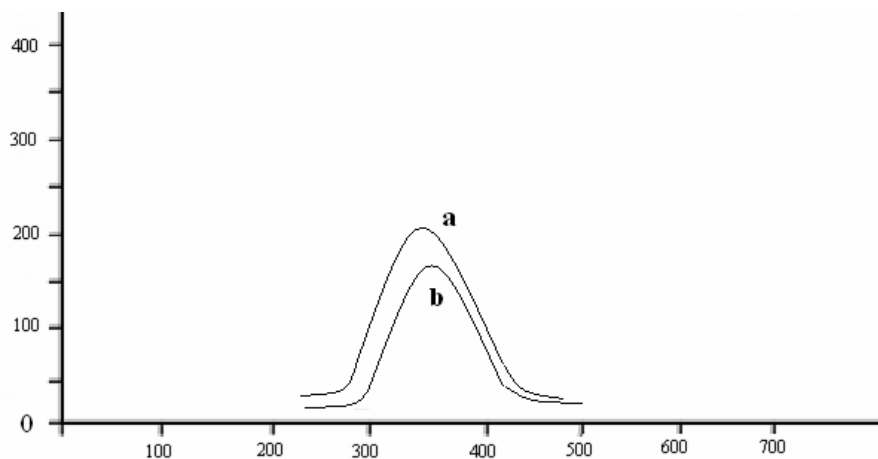

**Fig. S1.** Fluorescence spectra for ligand 4,4'-bipy (**a**) and [Zn(μ-4,4'-bipy)(NO<sub>2</sub>)<sub>2</sub>]<sub>n</sub> (**1**) (**b**). Solvent: MeOH, Room temperature,  $\lambda_{\text{exc}}=300$  nm.

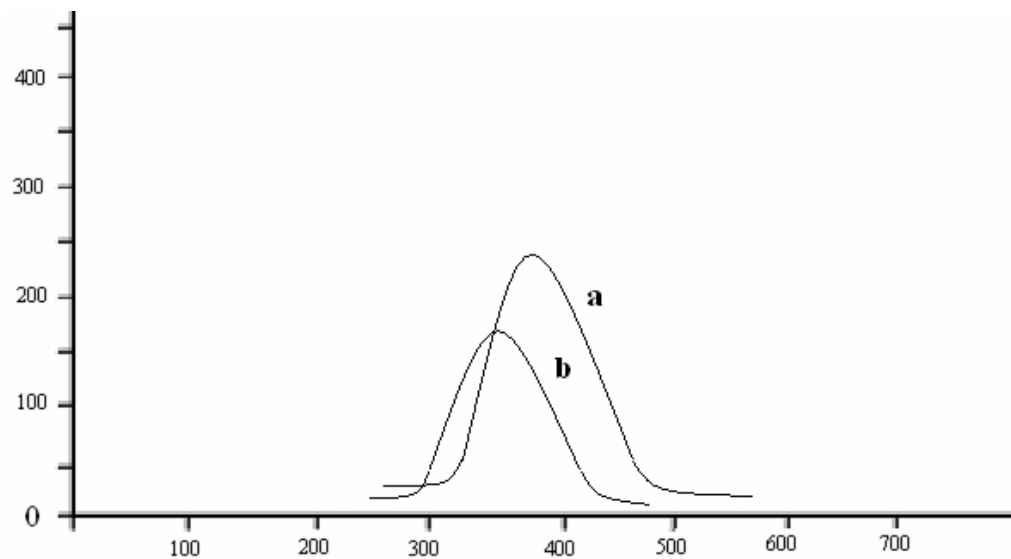

**Fig. S2.** Fluorescence spectra for ligand bpa (**a**) and  $[\text{Zn}(\mu\text{-bpa})(\text{NO}_2)_2]_n$  (**2**) (**b**). Solvent: MeOH, Room temperature,  $\lambda_{\text{exc}}=300$  nm.

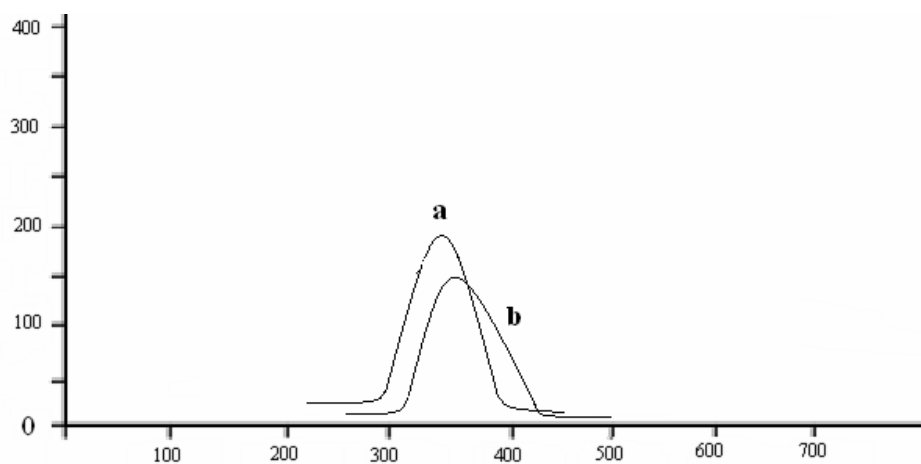

**Fig. S3.** Fluorescence spectra for ligand bpp (**a**) and [Zn( $\mu$ -bpp)(NO<sub>2</sub>)<sub>2</sub>]<sub>n</sub> (**4**) (**b**). Solvent: MeOH, Room temperature,  $\lambda_{exc}$ =300 nm.

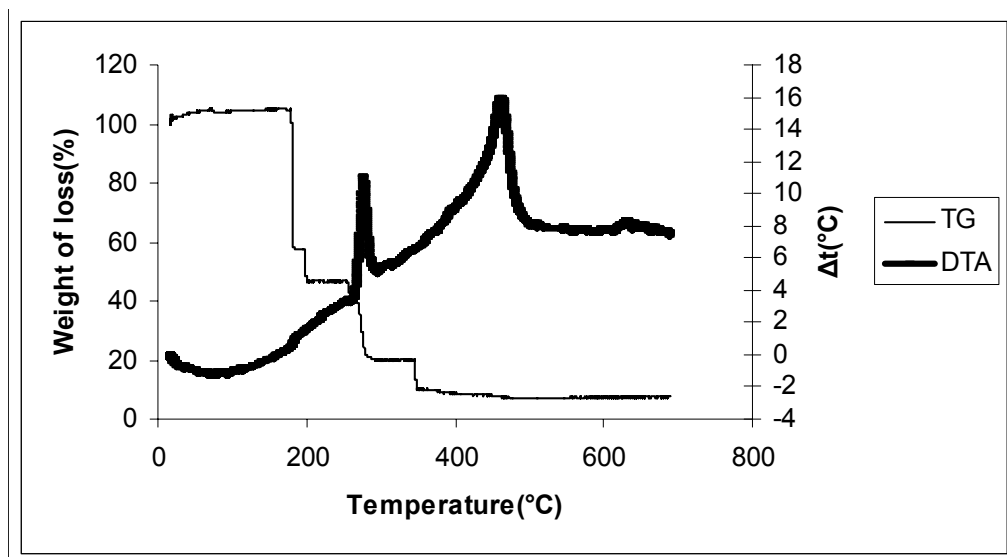

**Fig. S4.** Thermal behaviour of  $[\text{Zn}(\mu\text{-bpa})(\text{NO}_2)_2]_n$  (2).

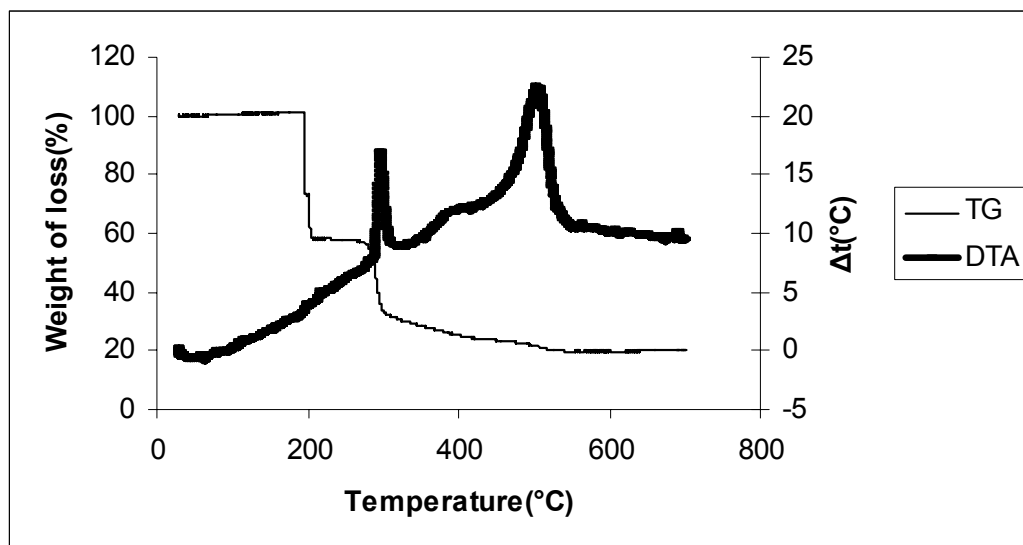

Fig. S5. Thermal behaviour of  $[\text{Zn}(\mu\text{-bpe})(\text{NO}_2)_2]_n$  (3).

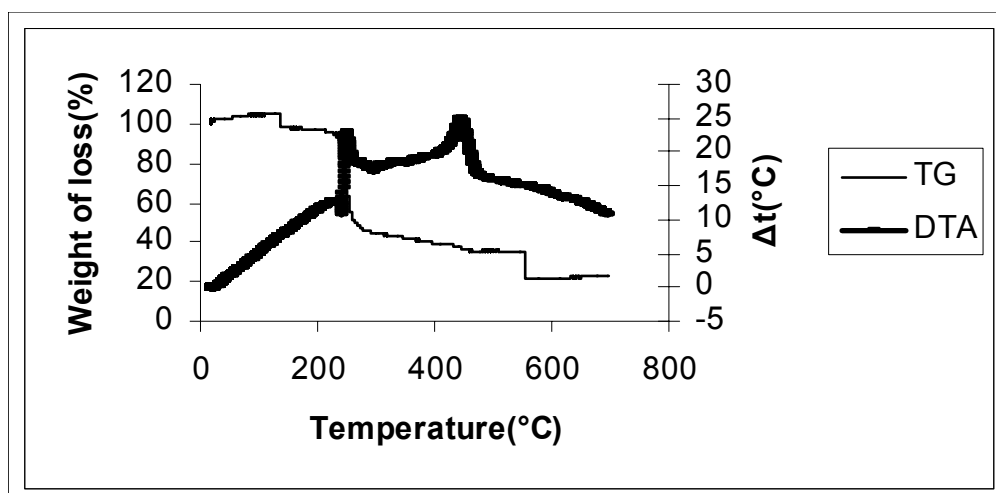

**Fig. S6.** Thermal behaviour of [Zn(μ-3-bpdb)(NO<sub>2</sub>)<sub>2</sub>]<sub>n</sub>·H<sub>2</sub>O (6).
